# Supplementary material for: Chronological Incongruences between Mitochondrial and Nuclear Phylogenies of Aedes Mosquitoes
Source: MDPI journal article supplement (doi:10.3390/life11030181), 2021-02-25

Supplementary figure S1: Maximum Liklehood analyses using RAXML and GTR+G

a. nuclear

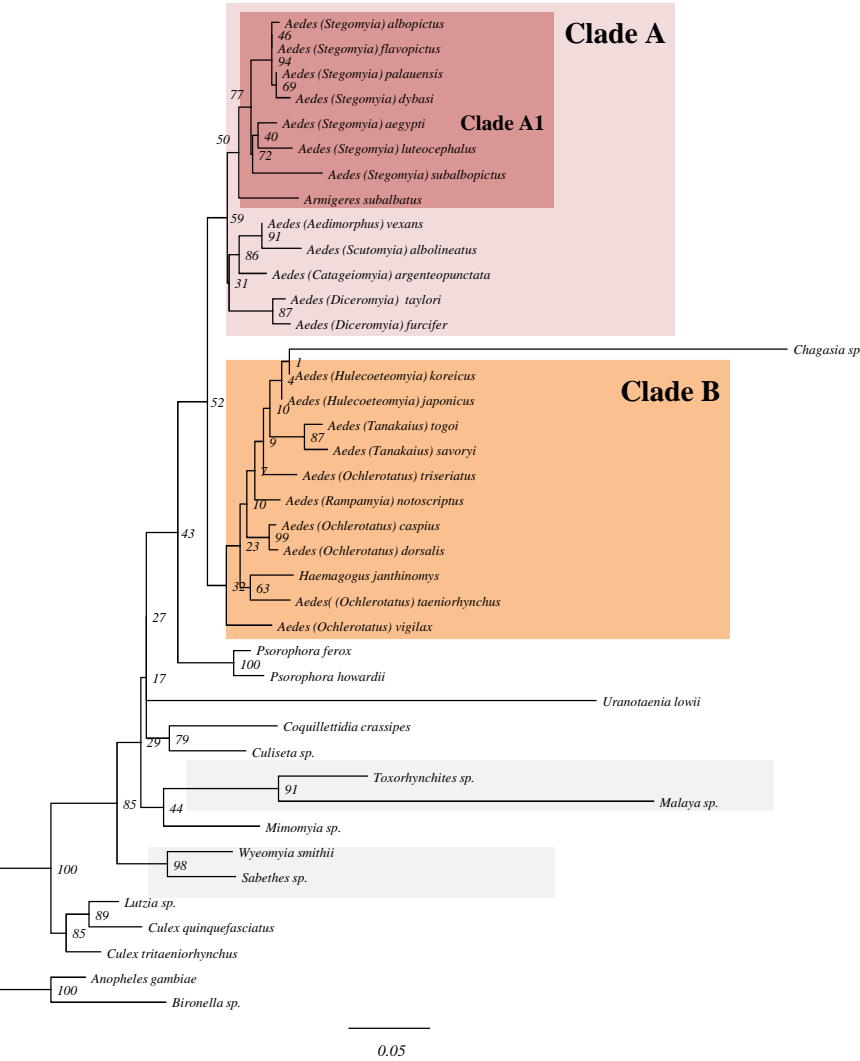

b. mitochondrial

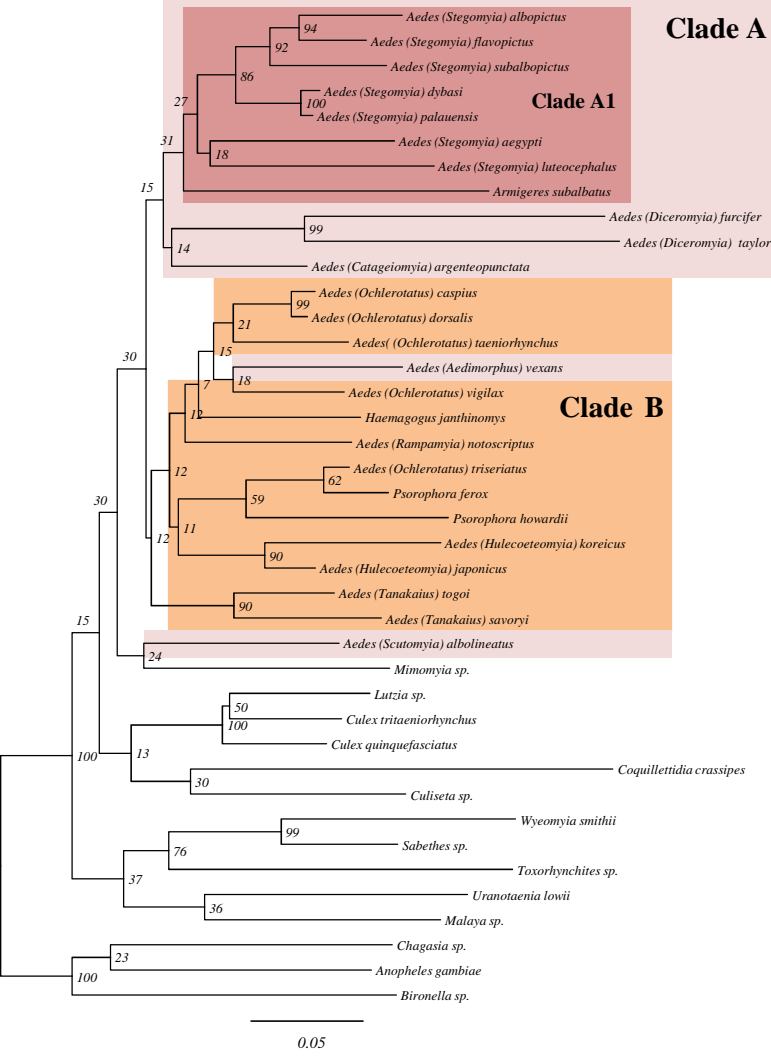

Supplementary figure S2: Bayesian trees of concatenated datasets

a: GTR+G Bayesian

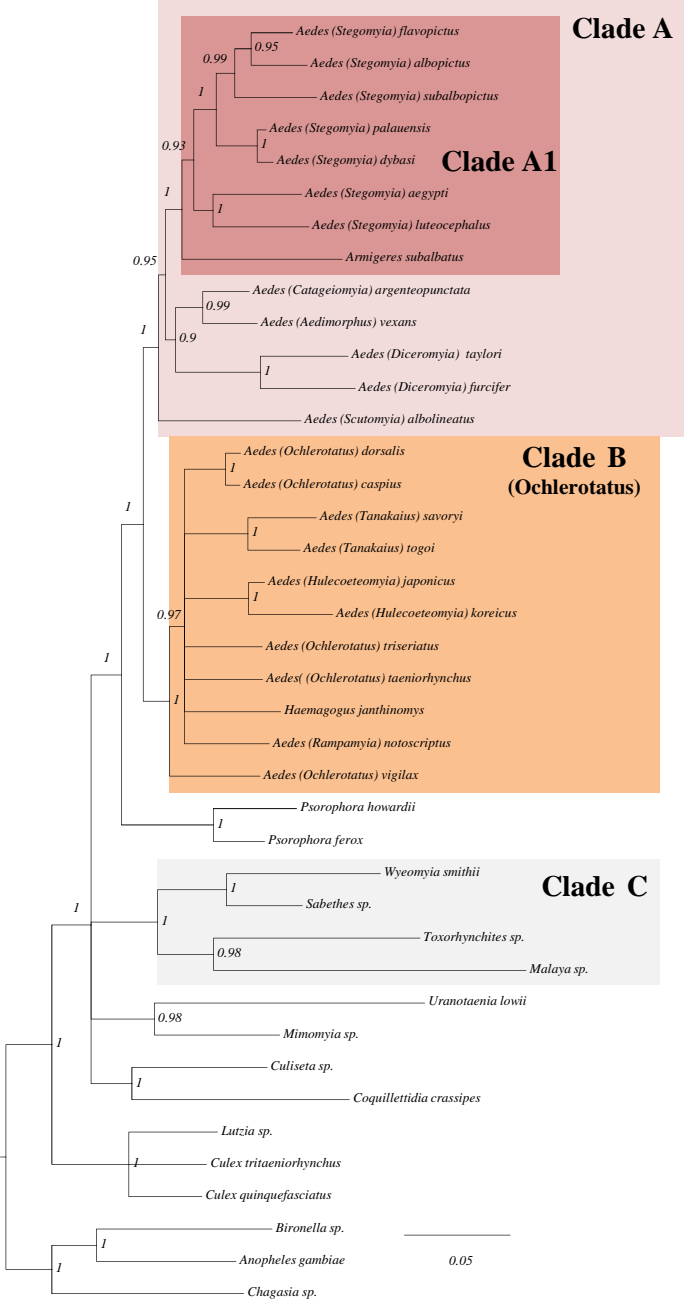

b: CAT+G Bayesian

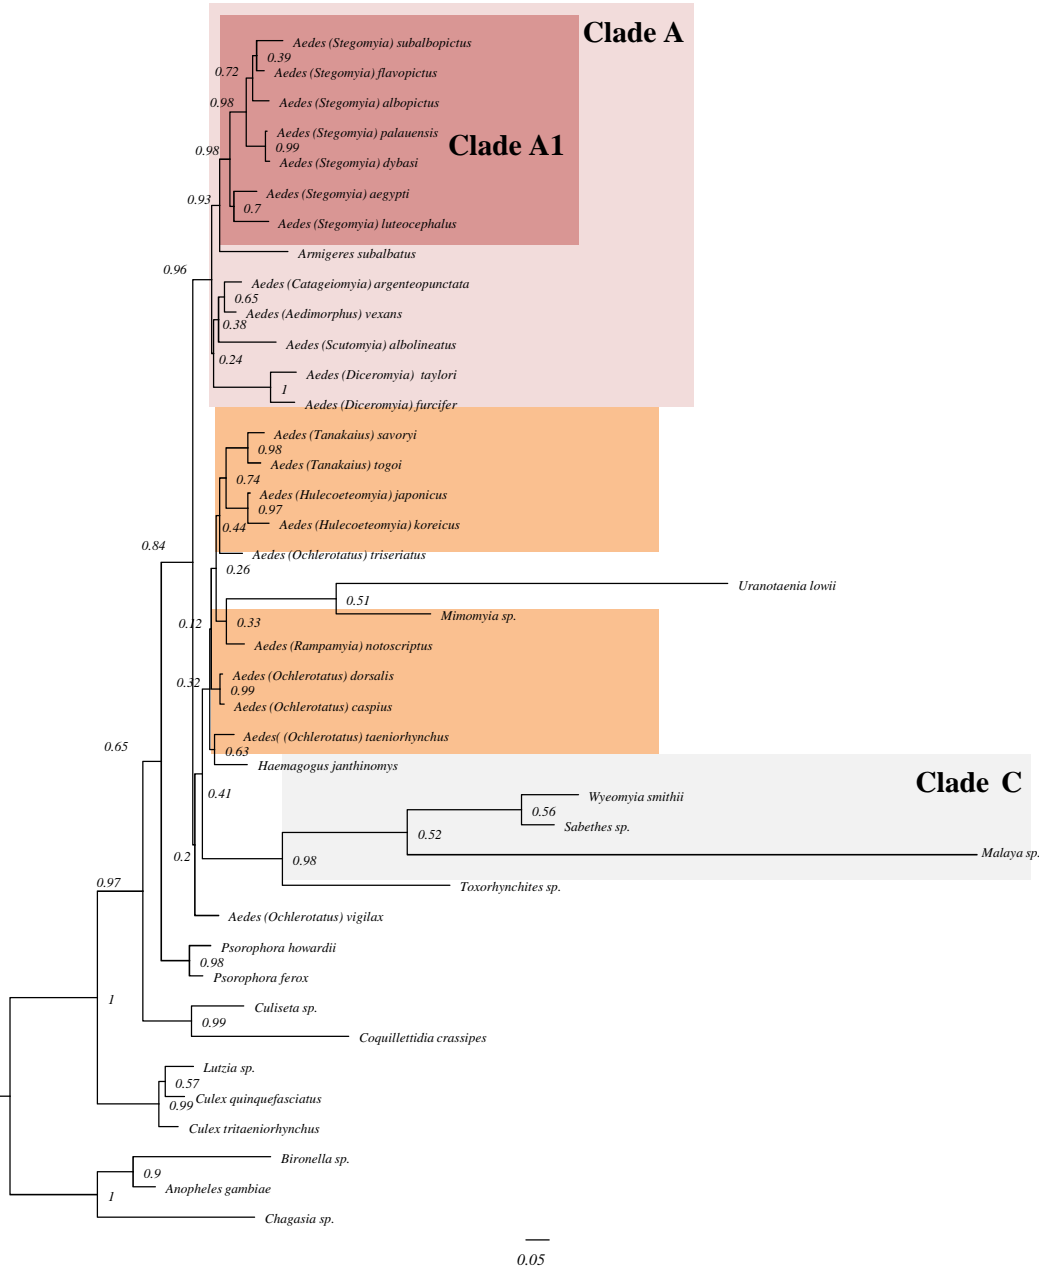

Supplementary figure S3: concatenated dataset, full trees

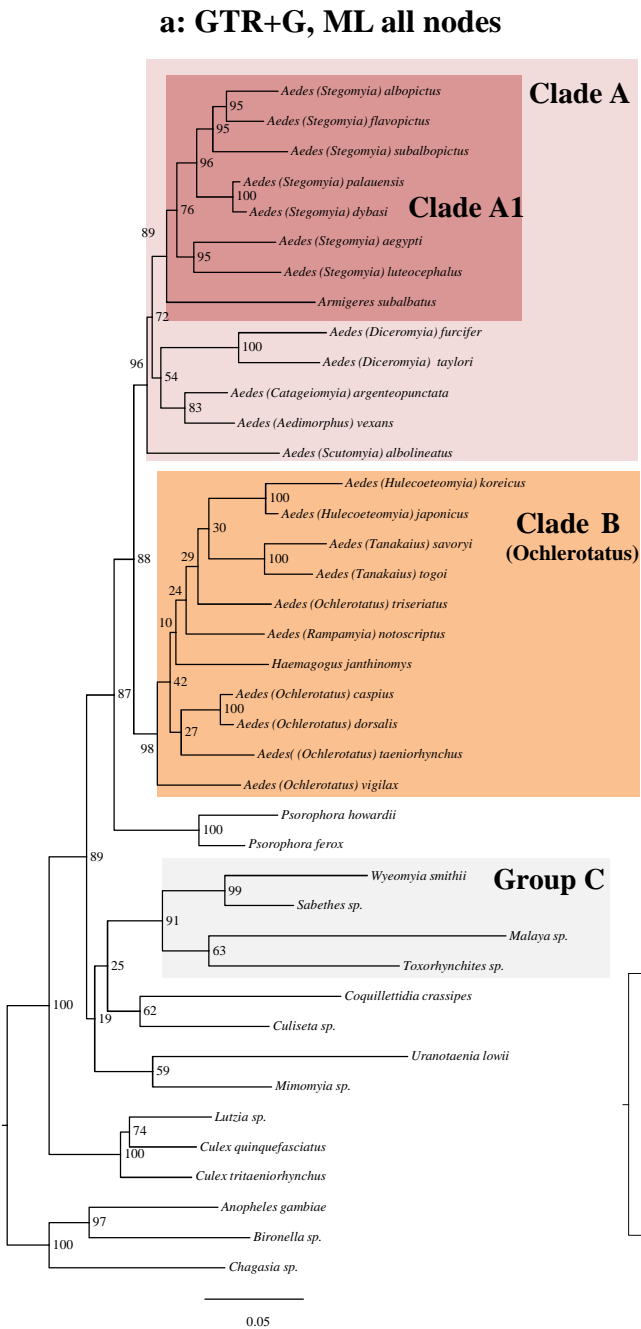

**b: GTR+G, Phylobayes all nodes**

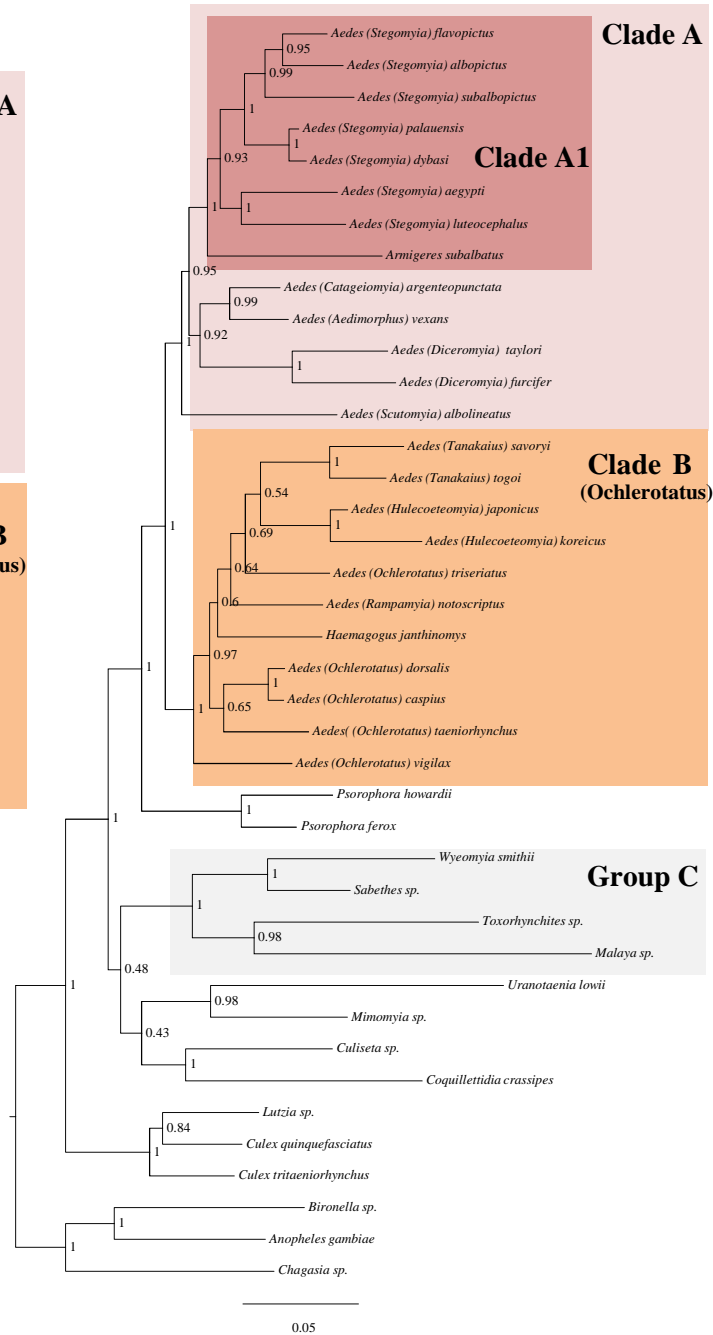

**c: GTR+G, ML Soghigian dataset**

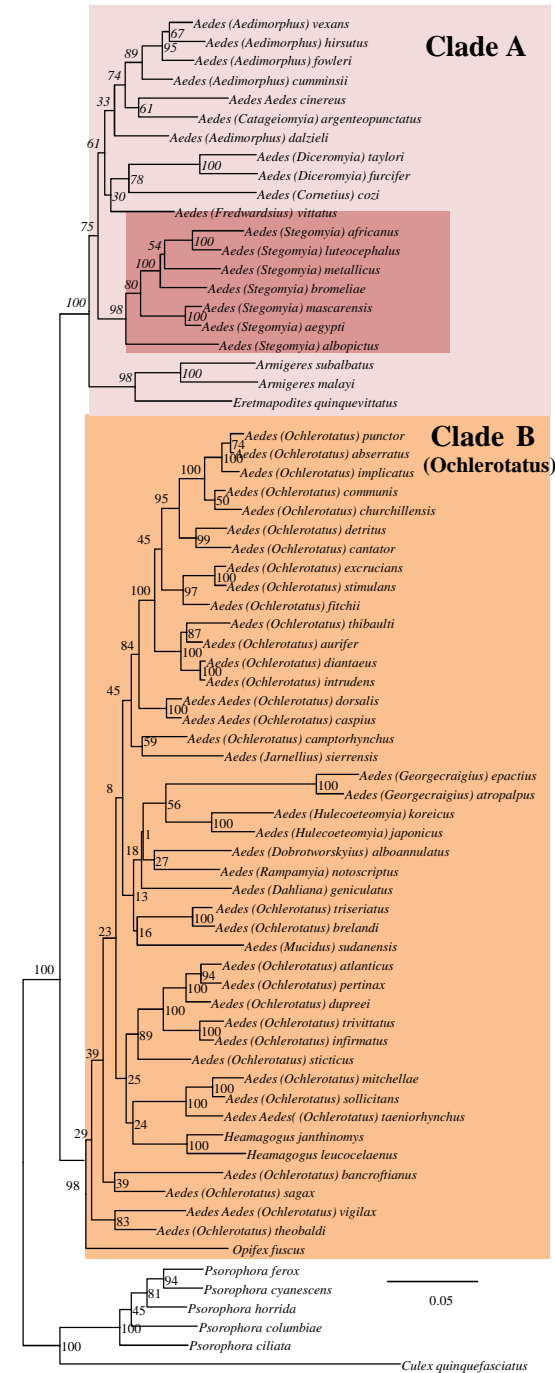

Supplementary figure S4: Soghigian dataset CAT+G full trees

a: Bayesian CAT+G, collapsed

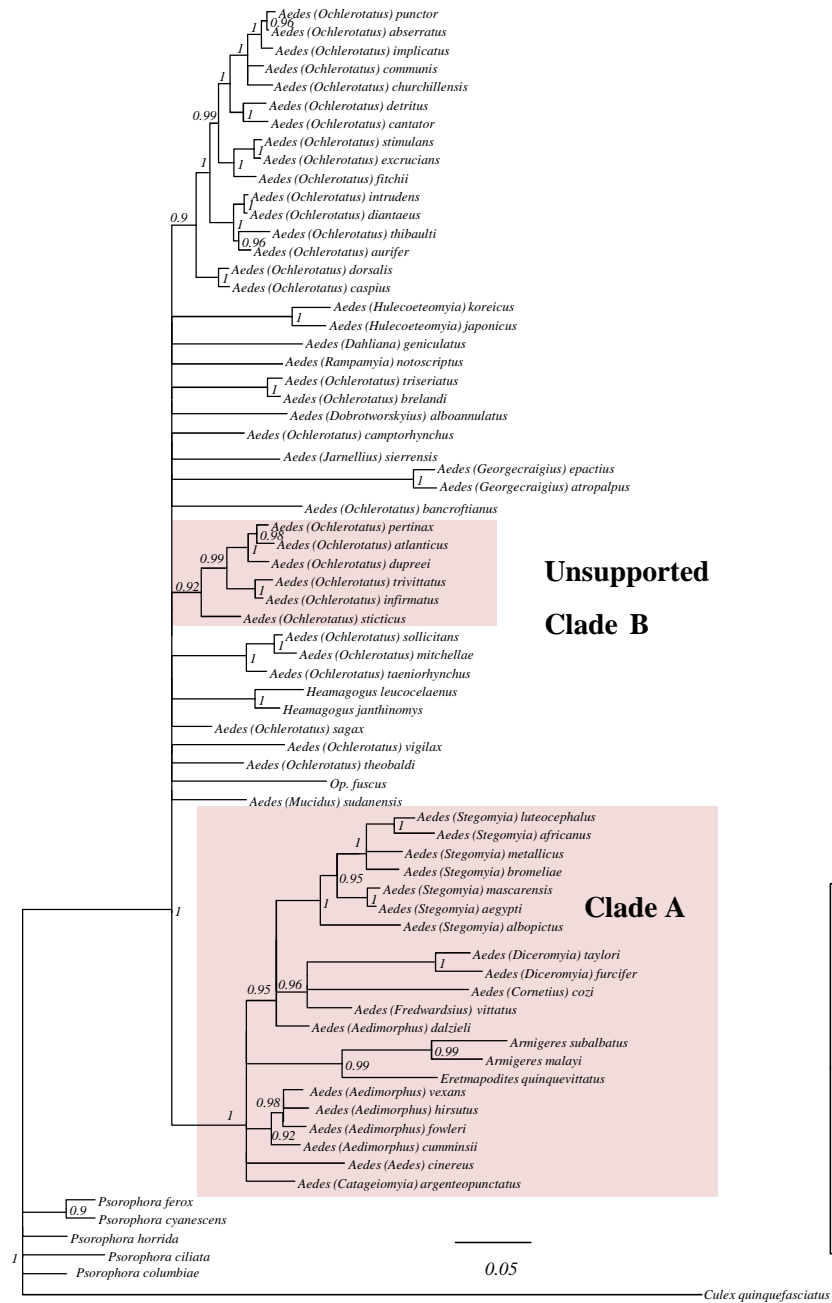

B: Bayesian CAT+G, full

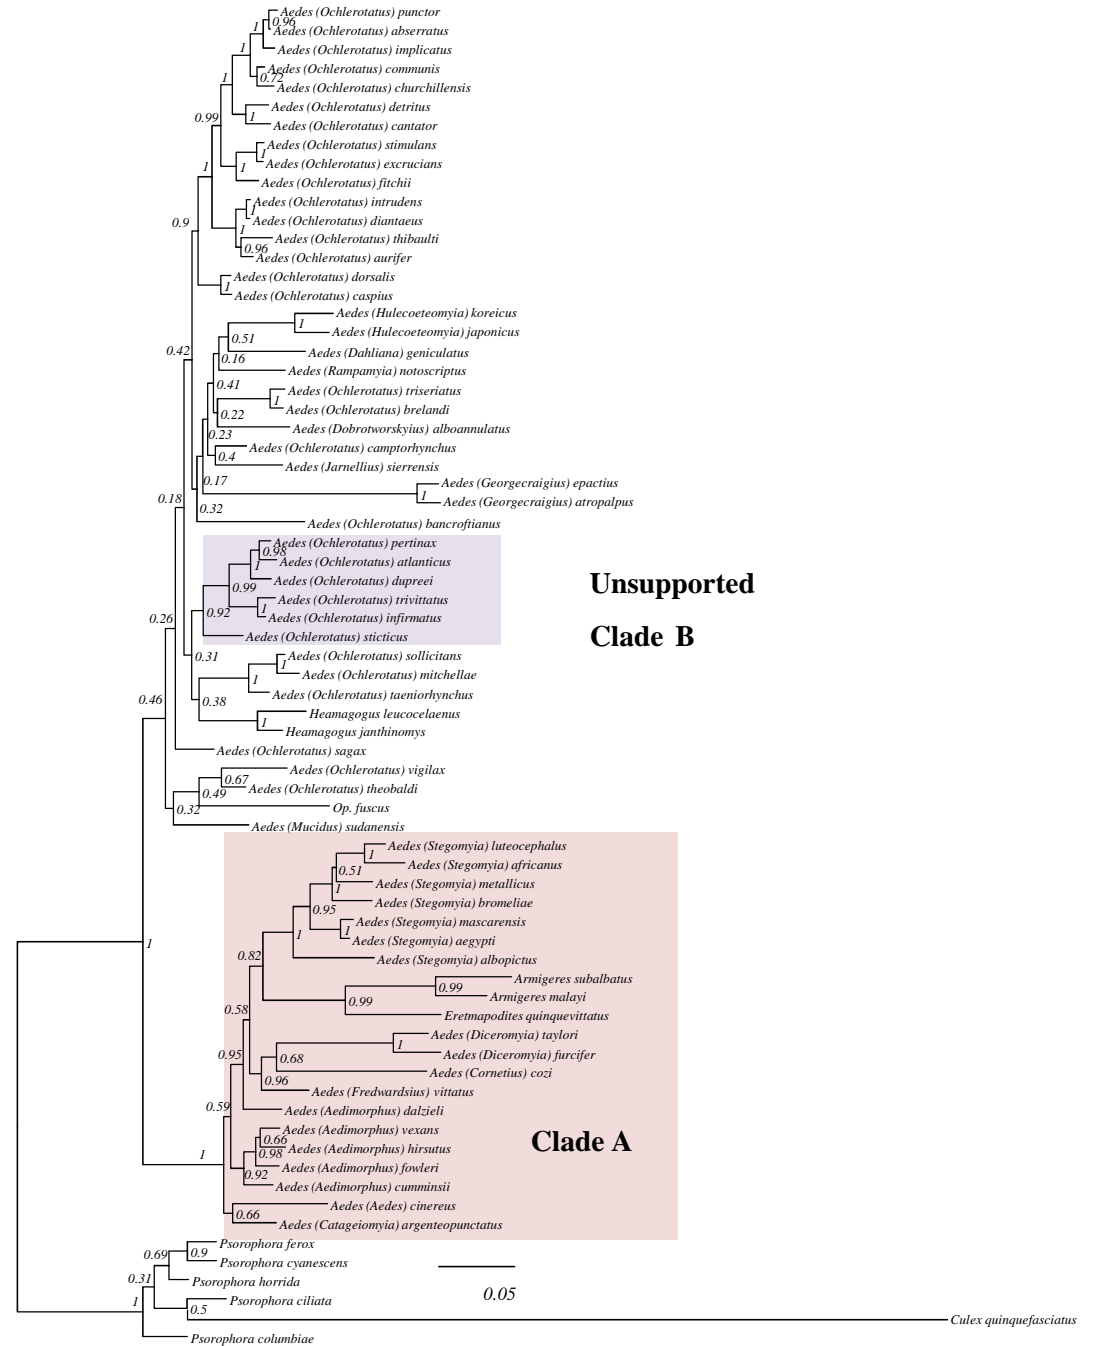

Supplementary figure S5: Cleaned datasetsBEAST trees.

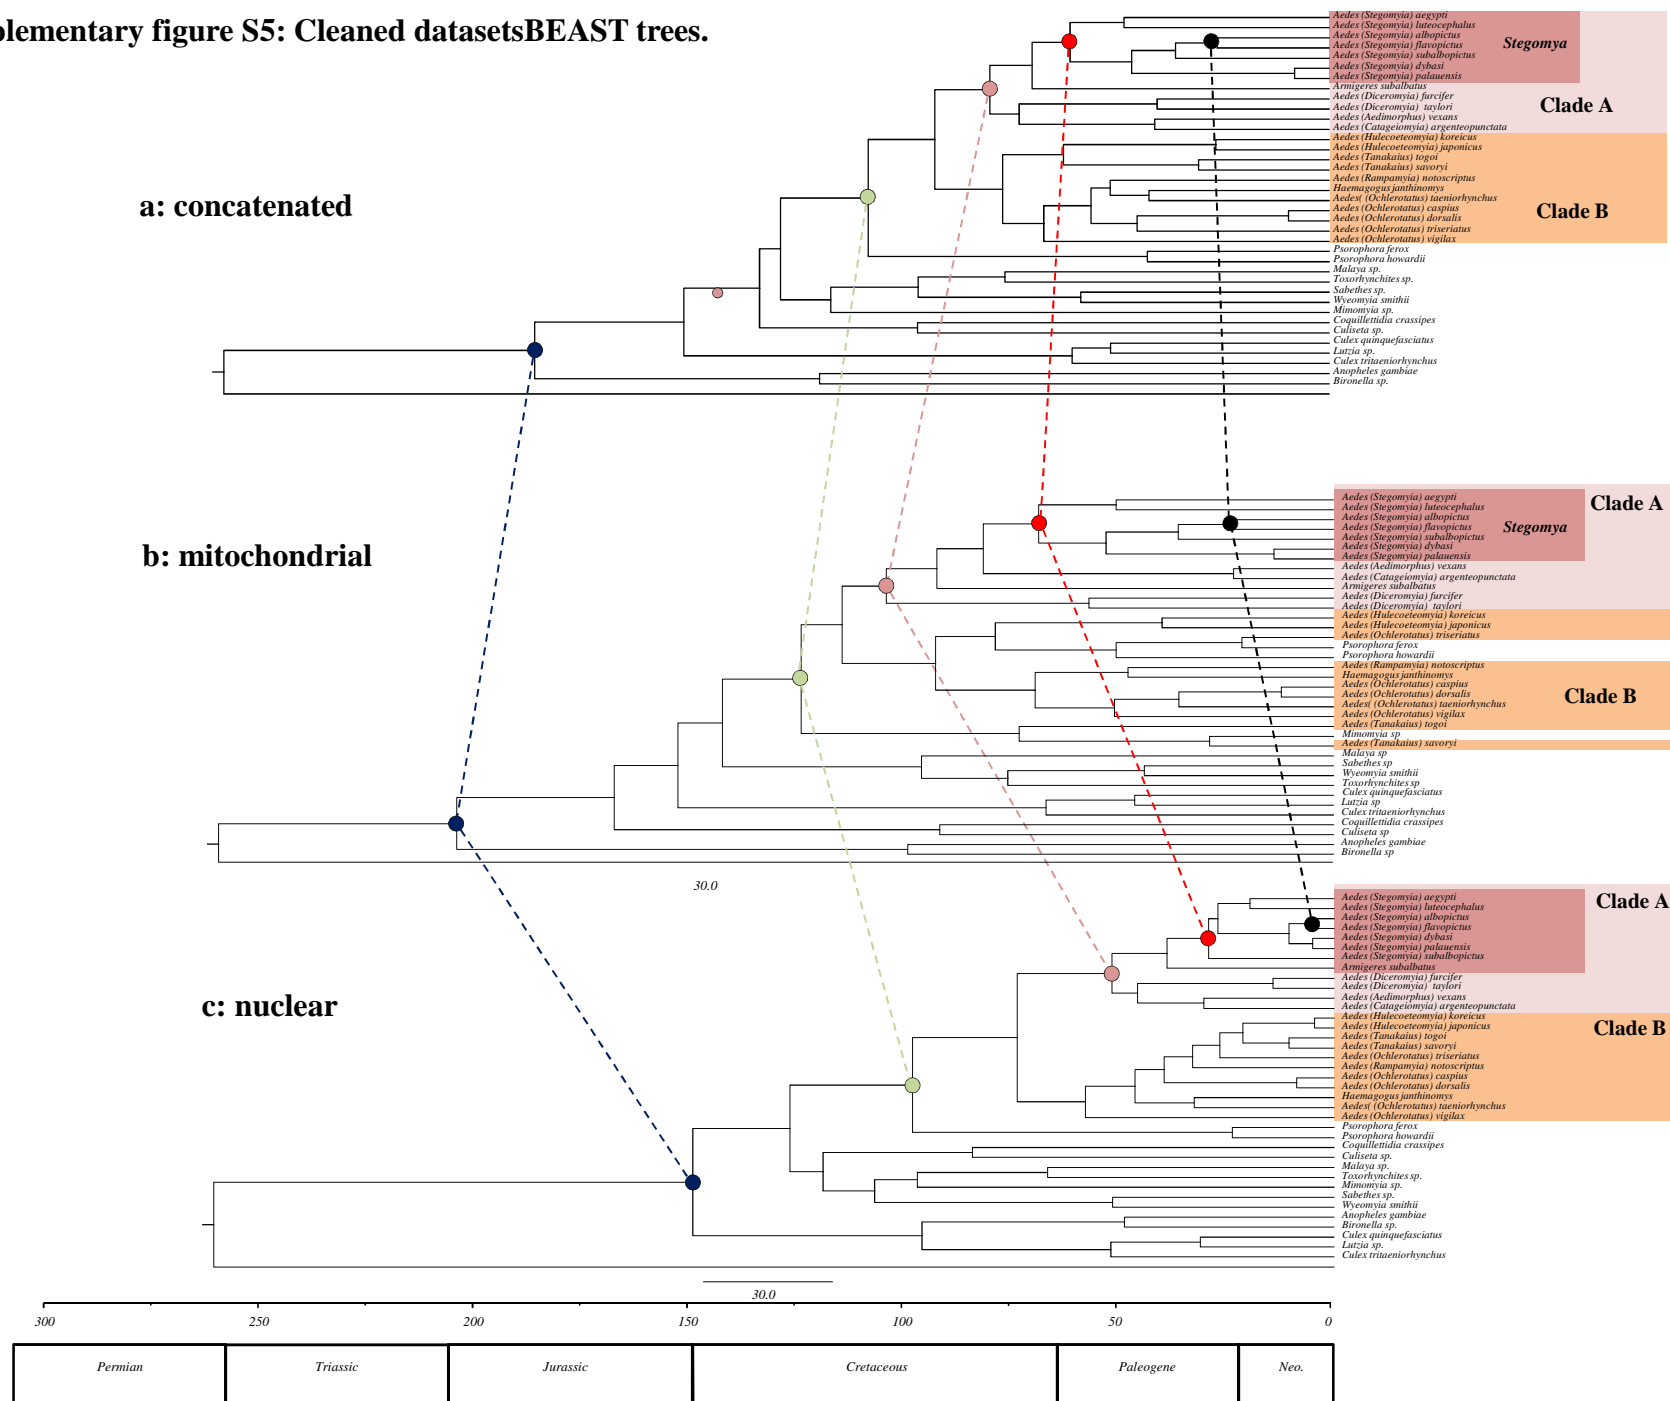

**Supplementary figure S6: Cleaned datasets BEAST trees. Posterior mean rates at nodes**

**a. nuclear**

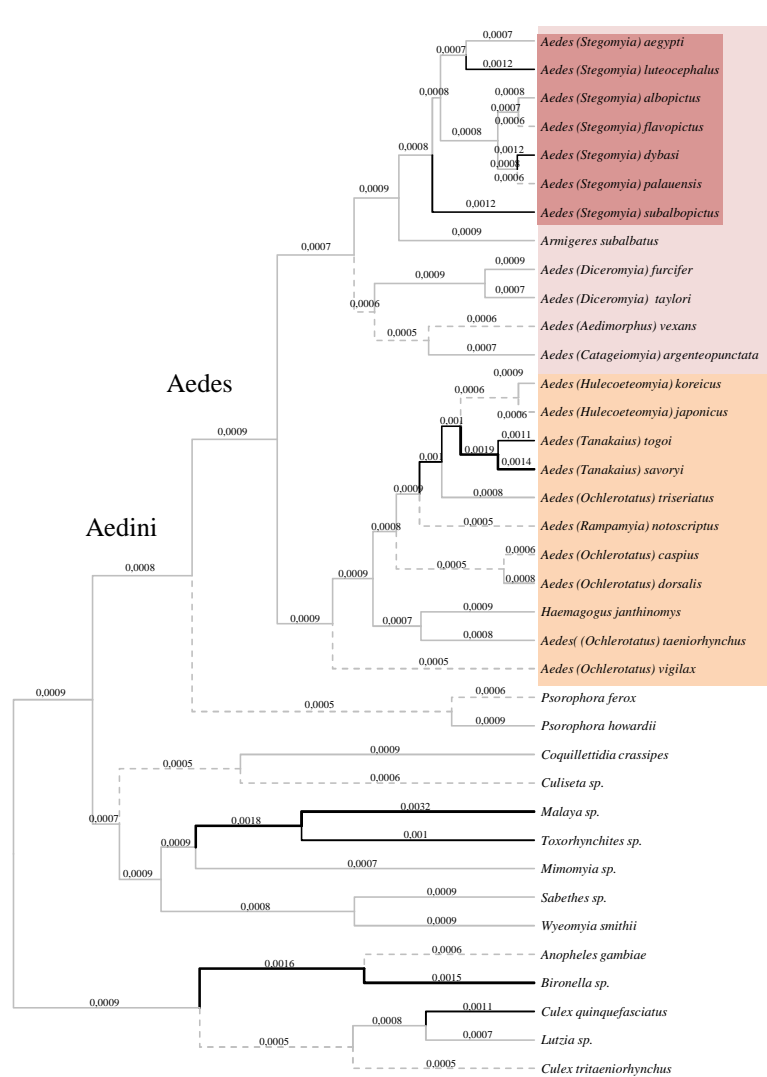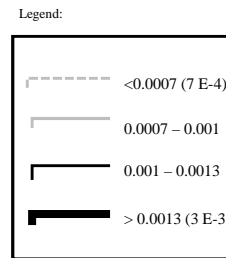

**b. mitochondrial**

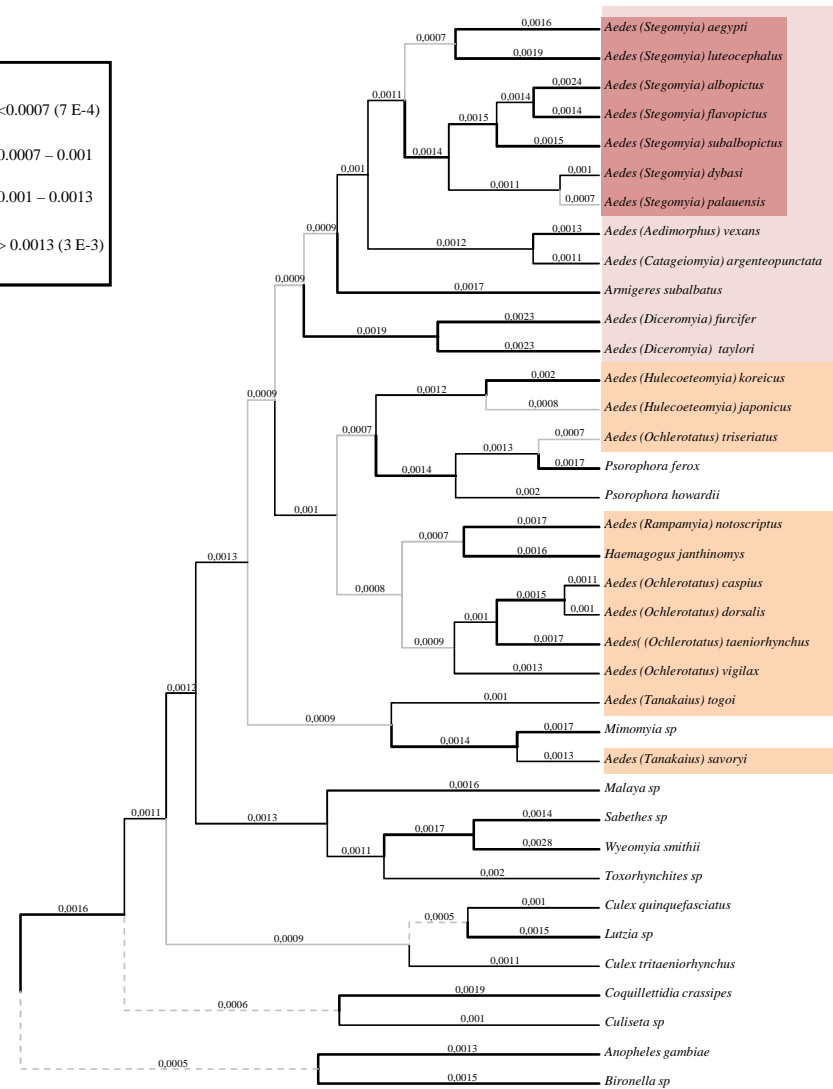

**Supplementary figure S7: Partitioned Soghigian BEAST trees.**

**a: mitochondrial**

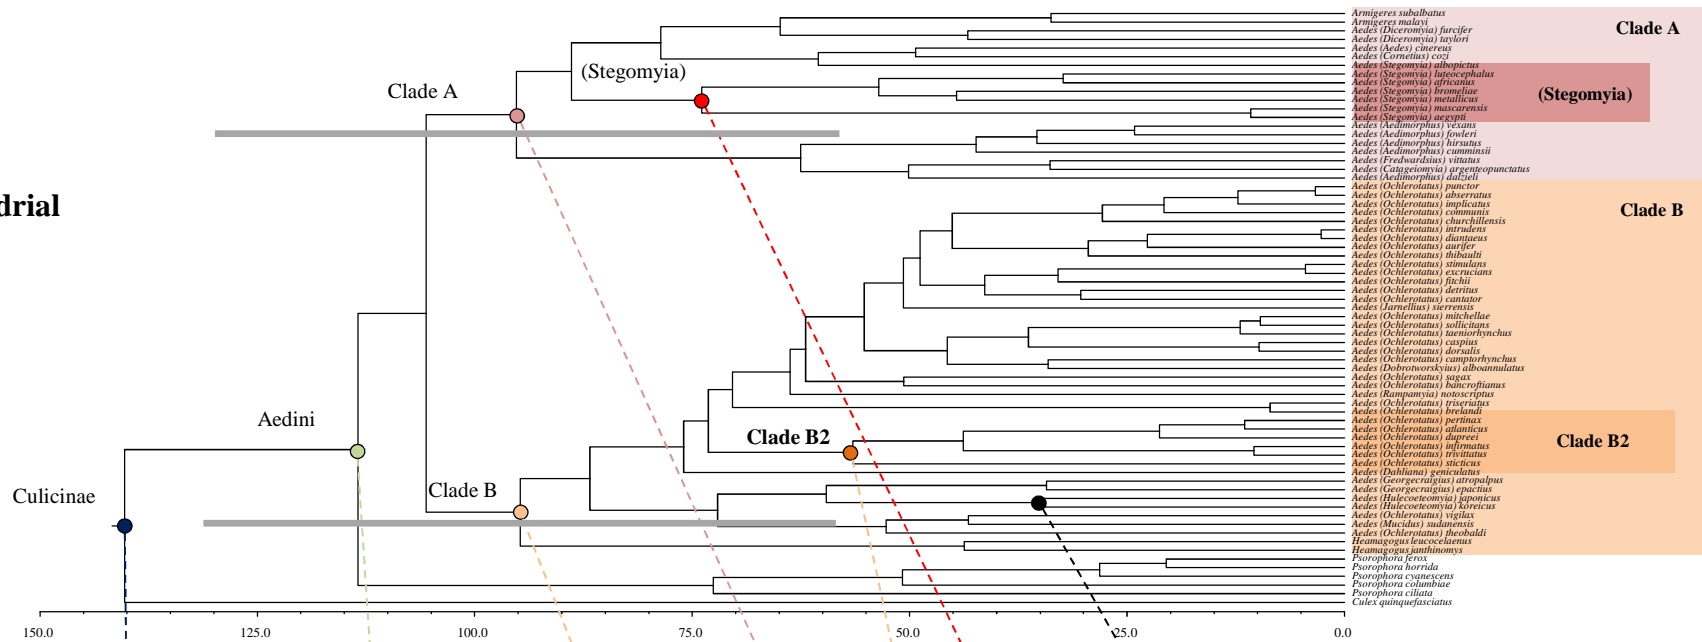

**b: nuclear**

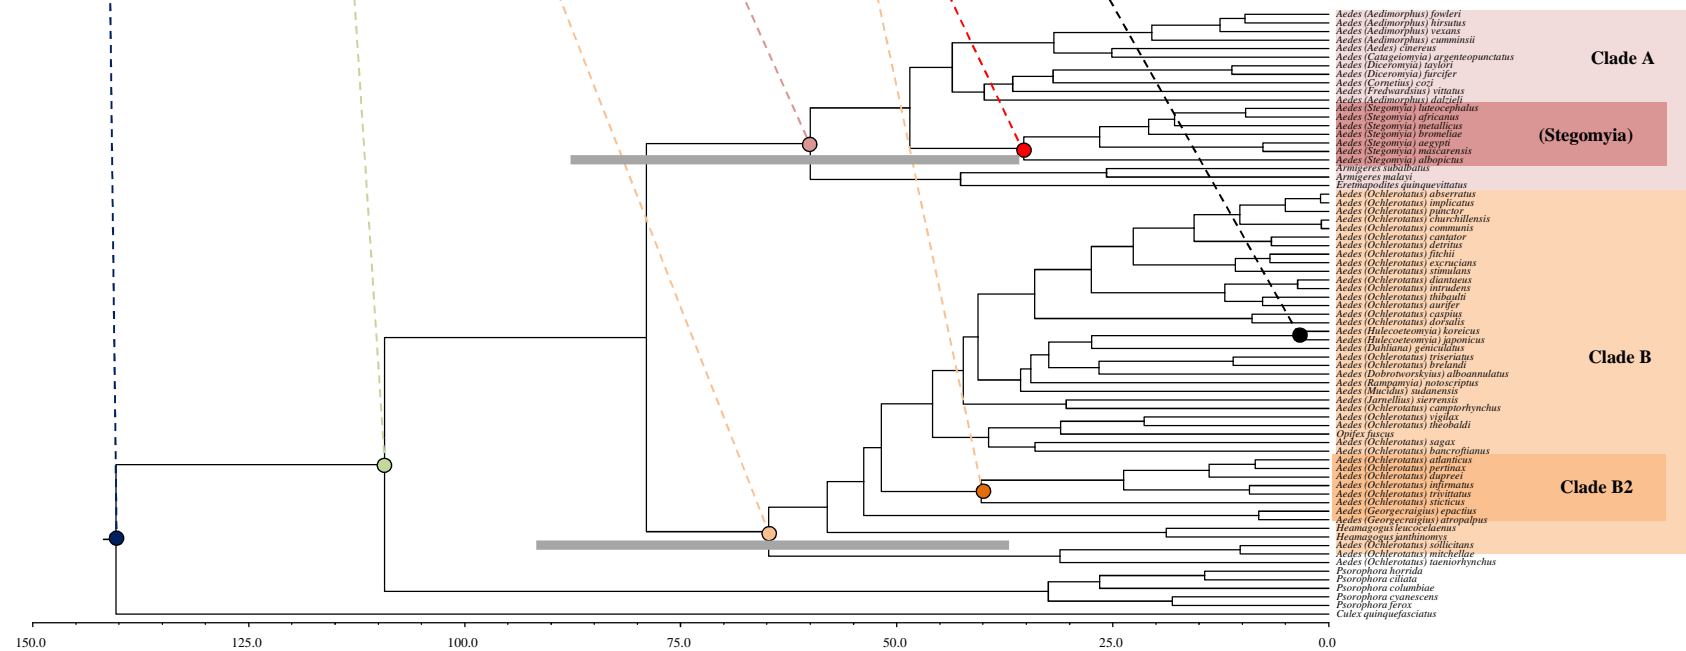

Supplementary figure S8: Phylobayes timetrees using the CAT+G model

a: mitochondrial

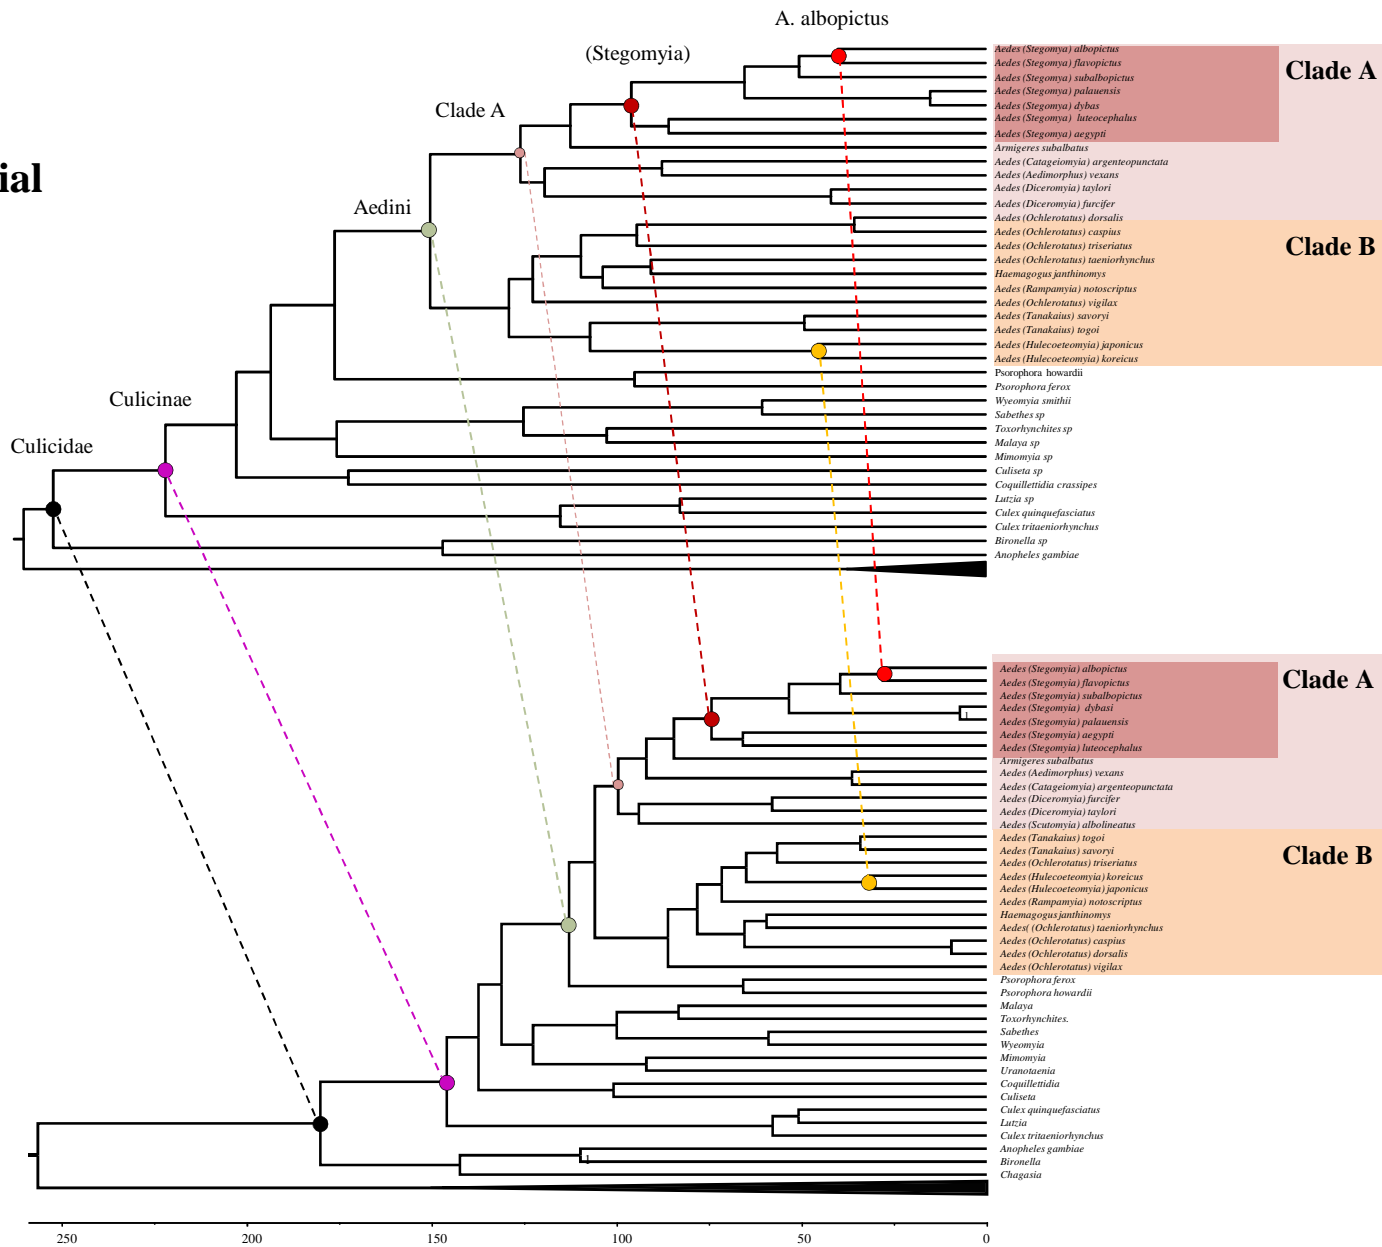

b: nuclear

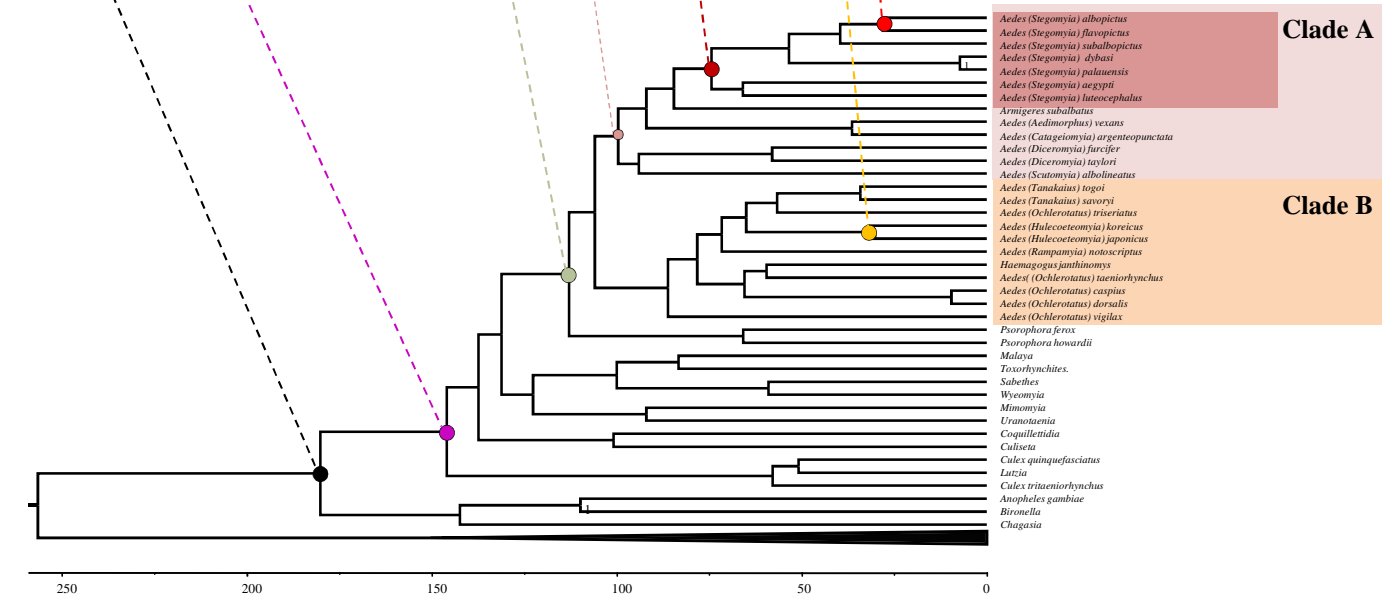

Supplement: s1 [file s1]
