# Supplementary material for: Chronological Incongruences between Mitochondrial and Nuclear Phylogenies of Aedes Mosquitoes
Source: MDPI journal article supplement (doi:10.3390/life11030181), 2021-02-25
Supplement: s1 [file s1]

**Table S1. Species names and gene list**

| Species name                                 | Nuclear genes            |                |                |                | Mitochondrial genes |            |            |            |
|----------------------------------------------|--------------------------|----------------|----------------|----------------|---------------------|------------|------------|------------|
|                                              | 28S                      | 18S            | Enolase        | Arg-kinase     | 16S                 | CoxI       | CoxII      | NAD4       |
| <i>Aedes (Stegomyia) aegypti</i>             | MG242540.1               | MG232525.1     | MG232460.1     | MG232457.1     | EU352212.1          |            |            |            |
| <i>Aedes (Scutomyia) albolineatus</i>        | KF687500.1               |                |                |                |                     | KF564650.1 | KC913592.1 |            |
| <i>Aedes (Stegomyia) albopictus</i>          | MG242543.1               | X57172.1       | MG232463.1     | MG232454.1     | AY072044.1          |            |            |            |
| <i>Aedes (Stegomyia) dybasi</i>              | DQ397943.1               |                |                |                | DQ397925.1          | DQ397913.1 |            |            |
| <i>Aedes (Stegomyia) flavopictus</i>         | DQ397936.1               |                |                |                | DQ397929.1          | DQ397907.1 |            |            |
| <i>Aedes (Diceromyia) furcifer</i>           | MG242572.1               | MG232557.1     | MG232487.1     | MG232431.1     |                     | KU187185.1 | AY645287.1 |            |
| <i>Aedes (Huleocoetomyia) koreicus</i>       | GU229913.1               |                |                |                |                     | KT962063.1 | GU229897.1 | KT945239   |
| <i>Aedes (Stegomyia) luteocephalus</i>       | MG242581.1               | MG232566.1     | MG232495.1     | MG232424.1     |                     | AY645234.1 | AY645300.1 | JX427527.1 |
| <i>Aedes (Rampamyla) notoscriptus</i>        | MG242585.1               | MG232570.1     | MG232499.1     | MG232420.1     | KM676218.1          |            |            |            |
| <i>Aedes (Stegomyia) palauensis</i>          | DQ397942.1               |                |                |                | DQ397924.1          | DQ397896.1 |            |            |
| <i>Aedes (Stegomyia) subalbopictus</i>       | KF687510.1               |                |                |                |                     | EU259301.1 | KC913583.1 |            |
| <i>Aedes (Diceromyia) taylori</i>            | MG242596.1               | MG232580.1     | MG232508.1     | MG232411.1     |                     | AY645228.1 | AY645295.1 |            |
| <i>Aedes (Tanakayus) togoi</i>               | GU229910.1               |                | LC026054.1     |                |                     | LC025711.1 | GU229895.1 | GU229922.1 |
| <i>Aedes (Aedimorphus) vexans</i>            | MG242602.1               | AM071382.1     | MG232513.1     | MG232406.1     |                     | AY645243.1 | AY645304.1 |            |
| <i>Anopheles gambiae</i>                     | GCA_000005575.1 (genome) |                |                |                | MG753708.1          |            |            |            |
| <i>Armigeres subalbatus</i>                  | MG242607.1               | MG232591.1     | MG232516.1     | MG232402.1     | AY439688.1          | KM497419.1 | HQ398972.1 | AY440746.1 |
| <i>Bironella</i> _sp.                        |                          | AF417796.1     | GQ906881.1     | GQ906808.1     | MF381612.1          |            |            |            |
| <i>Calliphora vomitoria</i>                  | MF281681.1               | MF992252.1     |                |                | KT444440.1          |            |            |            |
| <i>Aedes (Catageiomyia) argenteopunctata</i> | MG242545.1               | MG232530.1     | MG232464.1     | MG232453.1     |                     | MG242468.1 |            |            |
| <i>Chagasia</i> _sp.                         | AF417831.1               | AF417797.1     |                |                | MF381717.1          |            |            |            |
| <i>Chrysomya megacephala</i>                 | KY197787.1               | FJ025483.1     |                |                | KT272787.1          |            |            |            |
| <i>Coquillettidia crassipes</i>              | KF687592.1               | AY988454.1     | GQ906883.1     |                |                     | KF564770.1 | KF687365.1 |            |
| <i>Culex quinquefasciatus</i>                | XM_001865926.1           | XM_001849752.1 | XM_001842566.1 | XM_001849602.1 | GU188856.2          |            |            |            |
| <i>Culex tritaeniorhynchus</i>               | KF687515.1               | U48385.1       |                |                | KT852976.1          |            |            |            |
| <i>Culiseta</i> sp.                          | KF687543.1               | AY988451.1     | GQ906882.1 fla | GQ906809.1     |                     | AF425848.1 |            |            |
| <i>Drosophila pseudoobscura</i>              | HQ110539.1               | XR_053284.1    | AF025805.1     | XM_015187032.1 | FJ899745.1          |            |            |            |
| <i>Drosophila sechellia</i>                  |                          | XR_048770.1    | XM_002041688.1 |                | AF200832.1          |            |            |            |
| <i>Drosophila simulans</i>                   | HQ110541.1               | AY037174.1     | DQ864222.1     | XM_016184539.1 | AY518672.1          |            |            |            |
| <i>Drosophila yakuba</i>                     | HQ110545.1               |                | DQ864189.1     | XM_002093328.2 | KF824886.1          |            |            |            |
| <i>Haemagogus janthinomys</i>                | MG242608.1               | MG232592.1     | MG232517.1     | MG232401.1     | KT372555.1          |            |            |            |

|                                            |                 |            |            |            |                |                          |                |                |
|--------------------------------------------|-----------------|------------|------------|------------|----------------|--------------------------|----------------|----------------|
| <i>Lucilia caesar</i>                      | MF694304.1      | FJ025492.1 |            |            |                | KM657111.1               |                |                |
| <i>Lucilia cuprina</i>                     | FR719299.1      |            |            | JQ088101.1 |                | JX913750.1               |                |                |
| <i>Lucilia sericata</i>                    | KY197804.1<br>: | KR133393.1 |            |            |                | KT272854.1               |                |                |
| <i>Lutzia sp.</i>                          | KF687516.1      |            |            |            |                | HQ3988<br>96.1           | HQ3989<br>58.1 |                |
| <i>Malaya sp.</i>                          | KF687541.1      |            |            | GQ906814.1 |                | EU25929<br>3.1           | KF6873<br>73.1 |                |
| <i>Mimomyia sp.</i>                        | KF687538.1      |            | GQ906889.1 | GQ906816.1 |                |                          | KU3804<br>47.1 |                |
| <i>Aedes (Ochlerotatus) caspius</i>        | MG242555.1      | MG232540.1 | MG232473.1 | MG232444.1 |                | KM452934.1               |                |                |
| <i>Aedes (Ochlerotatus) dorsalis</i>       | MG242565.1      |            | MG232480.1 | MG232436.1 | KU8806<br>57.1 | KR69154<br>4.1           | KC9135<br>69.1 |                |
| <i>Aedes (Hulecoetomyia) japonicus</i>     | MG242580.1      | MG232565.1 |            | MG232425.1 | DQ3979<br>15.1 | DQ397889.1<br>KC913579.1 |                | DQ4701<br>64.1 |
| <i>Aedes (Ochlerotatus) taeniorhynchus</i> | MG242595.1      | MG232579.1 | MG232507.1 | MG232412.1 |                | KT76653<br>8.1           | HQ8536<br>80.1 |                |
| <i>Aedes (Ochlerotatus) triseriatus</i>    | MG242600.1      | MG232584.1 | MG232511.1 | MG232408.1 |                | AF41773<br>0.1           | AF4177<br>66.1 |                |
| <i>Aedes (Ochlerotatus) vigilax</i>        | MG242603.1      | MG232587.1 | MG232514.1 | MG232405.1 | MK575484.1     |                          |                |                |
| <i>Psorophora ferox</i>                    | MG242613.1      | MG242613.1 | MG232521.1 | MG232396.1 |                | MF1723<br>49.1           |                |                |
| <i>Psorophora howardii</i>                 | MG232599.1      | MG232599.1 | MG232523.1 |            |                | MG2425<br>38.1           |                |                |
| <i>Sabethes sp.</i>                        |                 |            |            | GQ906821.1 | NC_037498.1    |                          |                |                |
| <i>Sarcophaga sp.</i>                      | KU746469.1      | AF322419.1 |            |            | KM881633.1     |                          |                |                |
| <i>Aedes (Tanakaius) savoryi</i>           | LC025745.1      |            | LC026055.1 |            |                | LC02565<br>6.1           |                |                |
| <i>Toxorhynchites sp.</i>                  | KC177664.1      | AY988455.1 | GQ906895.1 | GQ906823.1 |                | AF425849.1               |                |                |
| <i>Uranotaenia lowii</i>                   | AF417833.1      | AF417799.1 |            | GQ906826.1 |                | AF41772<br>8.1           | AF4177<br>64.1 |                |
| <i>Wyeomyia smithii</i>                    |                 |            | GQ906899.1 | GQ906827.1 |                | HM136816.1               |                |                |
